# Supplementary material
Source: MDPI journal article supplement (https://www.mdpi.com/2071-1050/5/10/4502)
Supplement: s1 [file s1]

## **Supplementary Materials**

The research materials supporting this publication can be accessed by contacting Dr. Christopher T. Boyko at [c.boyko@lancaster.ac.uk](mailto:c.boyko@lancaster.ac.uk) or +44 (0)1524 10 876.
